# Supplementary material for: Ultrasound as a Physical Elicitor to Improve Texture in Blueberry Fruit: Physiological Indicator and Transcriptomic Analysis
Source: MDPI journal article supplement (doi:10.3390/foods13203246), 2024-10-12
Supplement: s1 [file foods-3217097-Supplementary data.pdf › foods-3217097-Supplementary data.pdf]

**Table S1. Details of primers for qRT-PCR used in this study.**

| <b>Gene name</b> | <b>Forward primer(5'-3')</b> | <b>Reverse primer(5'-3')</b> |
|------------------|------------------------------|------------------------------|
| <i>EF1A</i>      | TGGAAATGGGTATGCCCCAG         | ACCATACCGGCATCTCCATTC        |
| <i>C4H</i>       | TCAAGGAGAGGAGGTTGCAG         | TCAAGGAGAGGAGGTTGCAG         |
| <i>COMT1</i>     | AATGATCCCAGATGGCACGA         | TATGAACAGCACCGTGTCTCT        |
| <i>POD52</i>     | TATGAACAGCACCGTGTCTCT        | TATGAACAGCACCGTGTCTCT        |

**Table S2. Summary of RNA-Seq data and sequence assembly.**

| <b>sample</b> | <b>total clean_reads</b> | <b>total_map</b>  | <b>unique_map</b> | <b>Q20(%)</b> | <b>Q30(%)</b> |
|---------------|--------------------------|-------------------|-------------------|---------------|---------------|
| Control_1     | 43935034                 | 36548513 (85.20%) | 35794194 (95.08%) | 97.87         | 93.97         |
| Control_2     | 33257964                 | 40351294 (85.76%) | 27013723 (95.25%) | 97.96         | 94.27         |
| Control_3     | 44198288                 | 36707995 (85.36%) | 35637320 (94.58%) | 97.97         | 94.29         |
| US_1          | 42899472                 | 37645647 (85.68%) | 34596660 (94.66%) | 97.95         | 94.23         |
| US_2          | 47052442                 | 28360282 (85.27%) | 38284761 (94.88%) | 97.91         | 94.06         |
| US_3          | 43002488                 | 37678660 (85.25%) | 34815627 (94.84%) | 97.89         | 94.12         |
